# Supplementary material
Source: publisher figshare collection journal article supplement (https://acs.figshare.com/ndownloader/files/3963787)
Supplement: Supplementary file 1 [file 3963787]

## Ligand Uptake Modulation by Internal Water Molecules and Hydrophobic Cavities in Hemoglobins

Juan P. Bustamante<sup>†</sup>, Stefania Abbruzzetti<sup>‡</sup>, Agnese Marcelli<sup>§</sup>, Diego Gauto<sup>†</sup>, Leonardo Boechi<sup>¶</sup>, Alessandra Bonamore<sup>‡</sup>, Alberto Boffi<sup>‡</sup>, Stefano Bruno<sup>‡</sup>, Alessandro Feis<sup>‡</sup>, Paolo Foggi<sup>‡,¶</sup>, Dario A. Estrin<sup>†,\*</sup>, Cristiano Viappiani<sup>‡,\*</sup>

<sup>†</sup>Departamento de Química Inorgánica, Analítica y Química Física, INQUIMAE-CONICET, Facultad de Ciencias Exactas y Naturales, Universidad de Buenos Aires, Buenos Aires, Argentina

<sup>‡</sup>Department of Physics and Earth Sciences “Macedonio Melloni”, University of Parma, and IBF-CNR, Parma, Italy

<sup>§</sup>LENS, European Laboratory for Non-linear Spectroscopy, Florence, Italy

<sup>¶</sup>Instituto de Cálculo, Facultad de Ciencias Exactas y Naturales, Universidad de Buenos Aires, Buenos Aires, Argentina

<sup>‡</sup>Istituto Pasteur, Fondazione Cenci Bolognetti, Department of Biochemical Sciences, University of Rome “La Sapienza”, Rome, Italy

<sup>¶</sup>Department of Biochemistry and Molecular Biology, University of Parma, Parma, Italy

<sup>‡</sup>Department of Chemistry “Ugo Schiff”, University of Florence, Florence, Italy

<sup>¶</sup>Department of Chemistry, University of Perugia, Italy, and INO-CNR, Florence, Italy

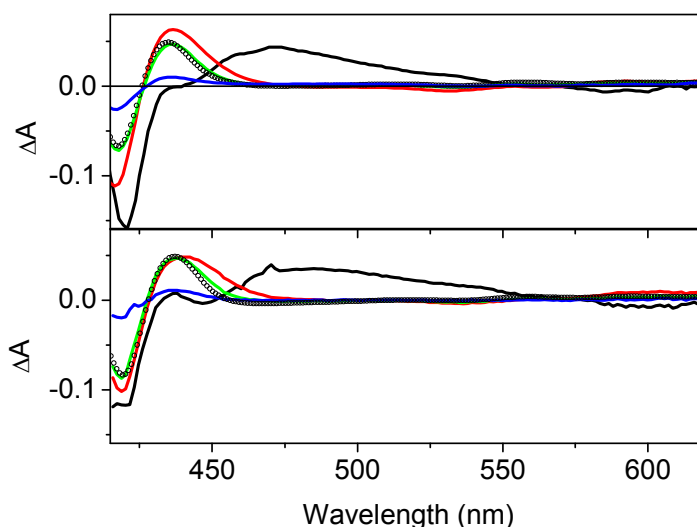

**Figure S1.** Decay associated spectra (DAS) obtained by the global analysis of the transient data of WG8F (top panel) and 3F *Tf*-trHb (bottom panel). The associated time constants are 0.2 ps (black), 7 ps (red), 400 ps (green) and >>2 ns (blue) for WG8F and 0.2 ps (black), 6 ps (red), 800 ps (green) and >>2 ns (blue) for 3F *Tf*-trHb. For comparison, the properly scaled steady-state absorption difference spectrum (between CO-*Tf*-trHb and 5c-*Tf*-trHb) is reported as open circles.

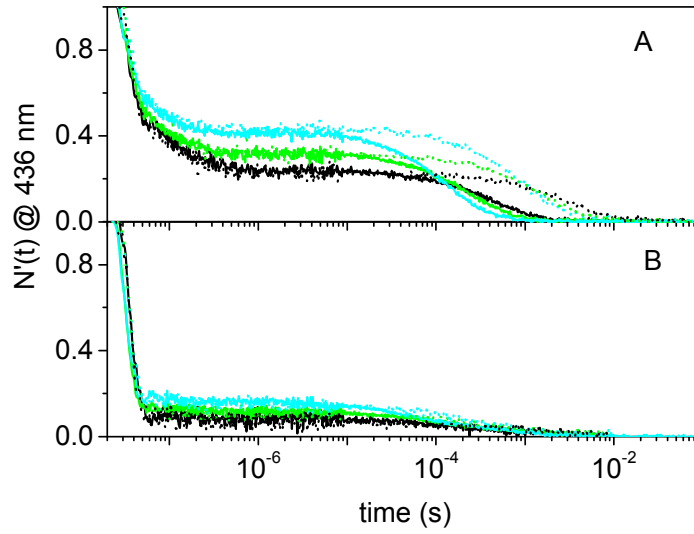

**Figure S2.** CO rebinding kinetics to WG8F (A) and 3F *Tf*-trHb (B) solutions at  $T = 10\text{ }^{\circ}\text{C}$  (black),  $T=20\text{ }^{\circ}\text{C}$  (green) and  $T=30\text{ }^{\circ}\text{C}$  (cyan), at 1 (solid lines) and 0.1 atm CO (dotted lines). Traces are normalized at the end of nanosecond laser pulse ( $N'(t)= \Delta A(t)/ \Delta A(20\text{ ns})$ ). Protein concentration is  $\sim 30\text{ }\mu\text{M}$ .

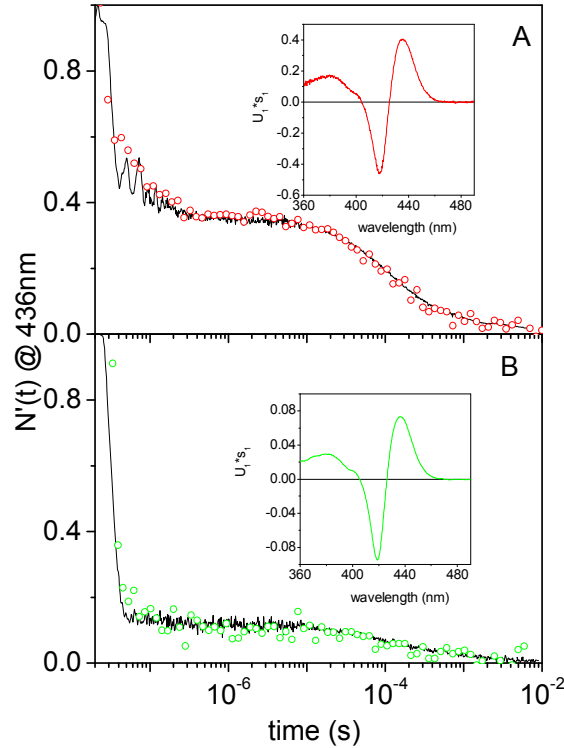

**Figure S3.** Comparison between the time courses of the amplitudes  $V_1$  (open circles) and the normalized absorbance change measured at 436 nm (in a single wavelength experiment) at the same CO pressure and temperature (panel A: WG8F *Tf*-trHb, panel B: 3F *Tf*-trHb). Traces at 436 nm are normalized at the end of nanosecond laser pulse ( $N'(t)=$

$\Delta A(t) / \Delta A(20 \text{ ns})$ ). The pressure of CO was 1 atm, and the spectra were measured at 20 °C. Inset: first ( $U_1$ ) component obtained from the SVD analysis on the time-resolved spectra measured. Spectra  $U_1$  are multiplied by the corresponding singular value  $S_1$  (5.3 and 4.5 for WG8F  $Tf$ -trHb and 3F  $Tf$ -trHb, respectively).
